# Supplementary material
Source: publisher figshare collection journal article supplement (https://sage.figshare.com/ndownloader/files/20066285)
Supplement: Supplementary file 1 [file 20066285]

Supplementary Table 1. Relationship between palliative care and length of hospital stay (log-transformed multilevel multivariate regression)

| Independent variable           | Coefficient, $\beta$       |         |                   |         |
|--------------------------------|----------------------------|---------|-------------------|---------|
|                                | Coefficient, $\beta$ (day) | P-value | (log transformed) | P-value |
| <b>Palliative care</b>         | 1.407                      | <.0001  | 0.178             | <.0001  |
| <b>Year</b>                    | -0.055                     | <.0001  | -0.002            | <.0001  |
| <b>Age group, years</b>        |                            |         |                   |         |
| < 30 (reference)               |                            |         |                   |         |
| 30–39                          | 0.028                      | 0.555   | 0.014             | 0.002   |
| 40–49                          | 0.124                      | 0.006   | 0.034             | <.0001  |
| 50–59                          | 0.388                      | <.0001  | 0.071             | <.0001  |
| 60–69                          | 0.419                      | <.0001  | 0.096             | <.0001  |
| 70–79                          | 0.447                      | <.0001  | 0.111             | <.0001  |
| $\geq 80$                      | 0.434                      | <.0001  | 0.134             | <.0001  |
| <b>Male sex</b>                | 0.155                      | 0.000   | 0.004             | 0.345   |
| <b>Race</b>                    |                            |         |                   |         |
| White (reference)              |                            |         |                   |         |
| Black                          | 0.360                      | <.0001  | 0.041             | <.0001  |
| Hispanic                       | 0.151                      | <.0001  | 0.016             | <.0001  |
| Asian or Pacific Islander      | 0.509                      | <.0001  | 0.045             | <.0001  |
| Native American/other          | 0.501                      | <.0001  | 0.037             | <.0001  |
| <b>Median household income</b> |                            |         |                   |         |

|                                                             |        |        |        |        |
|-------------------------------------------------------------|--------|--------|--------|--------|
| 76 <sup>th</sup> – 100 <sup>th</sup> percentile (reference) |        |        |        |        |
| 51 <sup>st</sup> – 75 <sup>th</sup> percentile              | -0.007 | 0.840  | 0.006  | 0.090  |
| 26 <sup>th</sup> – 50 <sup>th</sup> percentile              | 0.045  | 0.217  | 0.016  | <.0001 |
| 0 <sup>th</sup> – 25 <sup>th</sup> percentile               | 0.065  | 0.069  | 0.021  | <.0001 |
| <b>Primary payer</b>                                        |        |        |        |        |
| Private insurance (reference)                               |        |        |        |        |
| Medicare                                                    | 0.239  | <.0001 | 0.033  | <.0001 |
| Medicaid                                                    | 0.453  | <.0001 | 0.038  | <.0001 |
| Uninsured                                                   | 0.236  | <.0001 | 0.008  | 0.200  |
| Other                                                       | 0.216  | 0.002  | 0.022  | 0.003  |
| <b>Number of comorbidities</b>                              | 0.129  | <.0001 | 0.020  | <.0001 |
| <b>Primary diagnosis of lupus</b>                           | 1.075  | <.0001 | 0.142  | <.0001 |
| <b>In-hospital mortality</b>                                | 1.023  | <.0001 | -0.138 | <.0001 |
| <b>Severity of illness subclass</b>                         |        |        |        |        |
| APR-DRG 0, 1, lowest (reference)                            |        |        |        |        |
| APR-DRG 2                                                   | -0.875 | <.0001 | -0.101 | <.0001 |
| APR-DRG 3                                                   | 0.711  | <.0001 | 0.143  | <.0001 |
| APR-DRG 4, highest                                          | 6.704  | <.0001 | 0.655  | <.0001 |
| <b>Hospital status</b>                                      |        |        |        |        |
| Urban nonteaching (reference)                               |        |        |        |        |
| Urban teaching                                              | 0.185  | <.0001 | 0.016  | <.0001 |
| Rural                                                       | -0.283 | <.0001 | -0.039 | <.0001 |

**Region of hospital**

West (reference)

|           |        |        |       |        |
|-----------|--------|--------|-------|--------|
| Northeast | 0.503  | <.0001 | 0.082 | <.0001 |
| Midwest   | -0.062 | 0.118  | 0.022 | <.0001 |
| South     | 0.192  | <.0001 | 0.056 | <.0001 |

**Bed capacity of hospital**

Small (reference)

|        |        |        |        |        |
|--------|--------|--------|--------|--------|
| Medium | 0.060  | 0.053  | 0.021  | <.0001 |
| Large  | -0.223 | <.0001 | -0.008 | 0.017  |

---

Multilevel multivariable linear regression and logistic regression were performed after adjusting for the severity of illness subclass (APR-DRG 0–1, 2, 3, and 4), region of hospital (West, Northeast, Midwest, and South), hospital status (urban nonteaching, urban teaching, and rural), and bed capacity of hospital (small, medium, and large).

Supplementary Table 2. Relationships between palliative care and in-hospital mortality

| Independent variable                                       | Odds ratio | 95% CI |       |
|------------------------------------------------------------|------------|--------|-------|
| <b>Palliative care</b>                                     | 48.18      | 41.59  | 55.82 |
| <b>Year</b>                                                | 0.90       | 0.88   | 0.91  |
| <b>Age group, years</b>                                    |            |        |       |
| < 30 (reference)                                           | 1.00       |        |       |
| 30–39                                                      | 1.43       | 1.21   | 1.67  |
| 40–49                                                      | 1.69       | 1.45   | 1.96  |
| 50–59                                                      | 2.43       | 2.11   | 2.81  |
| 60–69                                                      | 3.35       | 2.89   | 3.88  |
| 70–79                                                      | 4.47       | 3.81   | 5.24  |
| ≥ 80                                                       | 5.99       | 5.04   | 7.10  |
| <b>Male sex</b>                                            | 1.21       | 1.11   | 1.32  |
| <b>Race</b>                                                |            |        |       |
| White (reference)                                          | 1.00       |        |       |
| Black                                                      | 1.07       | 0.98   | 1.15  |
| Hispanic                                                   | 1.19       | 1.07   | 1.33  |
| Asian or Pacific Islander                                  | 1.44       | 1.18   | 1.76  |
| Native American/other                                      | 1.14       | 0.96   | 1.36  |
| <b>Median household income</b>                             |            |        |       |
| 76 <sup>th</sup> –100 <sup>th</sup> percentile (reference) | 1.00       |        |       |
| 51 <sup>st</sup> –75 <sup>th</sup> percentile              | 0.95       | 0.86   | 1.04  |

|                                                |           |       |       |
|------------------------------------------------|-----------|-------|-------|
| 26 <sup>th</sup> – 50 <sup>th</sup> percentile | 1.06      | 0.96  | 1.16  |
| 0 <sup>th</sup> – 25 <sup>th</sup> percentile  | 1.13      | 1.03  | 1.24  |
| <b>Insurance type</b>                          |           |       |       |
| Private insurance (reference)                  | 1.00      |       |       |
| Medicare                                       | 1.06      | 0.97  | 1.15  |
| Medicaid                                       | 1.09      | 0.97  | 1.22  |
| Uninsured                                      | 1.44      | 1.22  | 1.71  |
| Other                                          | 1.22      | 0.99  | 1.50  |
| <b>Number of comorbidities</b>                 | 0.92      | 0.90  | 0.94  |
| <b>Main diagnosis of lupus</b>                 |           |       |       |
| No                                             | Reference |       |       |
| Yes                                            | 0.65      | 0.57  | 0.75  |
| <b>Severity of illness subclass</b>            |           |       |       |
| APR-DRG 0, 1, lowest (reference)               | 1.00      |       |       |
| APR-DRG 2                                      | 0.39      | 0.33  | 0.45  |
| APR-DRG 3                                      | 1.01      | 0.89  | 1.16  |
| APR-DRG 4, highest                             | 14.31     | 12.52 | 16.35 |
| <b>Hospital status</b>                         |           |       |       |
| Urban nonteaching (reference)                  | 1.00      |       |       |
| Urban teaching                                 | 1.00      | 0.93  | 1.07  |
| Rural                                          | 1.13      | 1.01  | 1.25  |
| <b>Region of hospital</b>                      |           |       |       |

|                  |      |      |      |
|------------------|------|------|------|
| West (reference) | 1.00 |      |      |
| Northeast        | 1.21 | 1.10 | 1.35 |
| Midwest          | 1.01 | 0.90 | 1.12 |
| South            | 1.13 | 1.03 | 1.23 |

**Bed capacity of hospital**

|        |           |      |      |
|--------|-----------|------|------|
| Small  | Reference |      |      |
| Medium | 0.93      | 0.85 | 1.01 |
| Large  | 0.92      | 0.83 | 1.01 |

---

Multilevel multivariable linear regression and logistic regression were performed after adjusting for the severity of illness subclass (APR-DRG 0–1, 2, 3, and 4), region of hospital (West, Northeast, Midwest, and South), hospital status (urban nonteaching, urban teaching, and rural), and bed capacity of hospital (small, medium, and large).

Supplementary Table 3. Relationship between in-hospital palliative care and hospital costs (inflation-adjusted) (log-transformed multilevel multivariate regression)

| Independent Variable                                        | Coefficient, $\beta$      |         |                   |         |
|-------------------------------------------------------------|---------------------------|---------|-------------------|---------|
|                                                             | Coefficient, $\beta$ (\$) | P-value | (log-transformed) | P-value |
| <b>Palliative care</b>                                      | -153.2                    | 0.948   | -0.075            | 0.009   |
| <b>Year</b>                                                 | 339.4                     | <.0001  | 0.021             | <.0001  |
| <b>Age group, years</b>                                     |                           |         |                   |         |
| < 30 (reference)                                            |                           |         |                   |         |
| 30–39                                                       | -267.4                    | 0.457   | 0.026             | <.0001  |
| 40–49                                                       | 1,350.7                   | <.0001  | 0.105             | <.0001  |
| 50–59                                                       | 3,349.8                   | <.0001  | 0.175             | <.0001  |
| 60–69                                                       | 3,493.5                   | <.0001  | 0.202             | <.0001  |
| 70–79                                                       | 1,305.9                   | 0.001   | 0.156             | <.0001  |
| $\geq 80$                                                   | -3,502.9                  | <.0001  | 0.032             | 0.001   |
| <b>Male sex</b>                                             | 2,549.0                   | <.0001  | 0.049             | <.0001  |
| <b>Race</b>                                                 |                           |         |                   |         |
| White (reference)                                           |                           |         |                   |         |
| Black                                                       | 1,998.4                   | <.0001  | 0.078             | <.0001  |
| Hispanic                                                    | 3,837.6                   | <.0001  | 0.146             | <.0001  |
| Asian or Pacific Islander                                   | 5,507.3                   | <.0001  | 0.097             | <.0001  |
| Native American/other                                       | 3,392.7                   | <.0001  | 0.080             | <.0001  |
| <b>Median household income</b>                              |                           |         |                   |         |
| 76 <sup>th</sup> – 100 <sup>th</sup> percentile (reference) |                           |         |                   |         |
| 51 <sup>st</sup> – 75 <sup>th</sup> percentile              | -692.3                    | 0.011   | -0.013            | 0.013   |
| 26 <sup>th</sup> – 50 <sup>th</sup> percentile              | -1,314.0                  | <.0001  | -0.023            | <.0001  |
| 0 <sup>th</sup> – 25 <sup>th</sup> percentile               | -1,820.6                  | <.0001  | -0.048            | <.0001  |
| <b>Primary payer</b>                                        |                           |         |                   |         |
| Private insurance (reference)                               |                           |         |                   |         |
| Medicare                                                    | 379.3                     | 0.087   | 0.019             | <.0001  |
| Medicaid                                                    | -1,334.3                  | <.0001  | -0.080            | <.0001  |

|                                     |           |        |        |        |
|-------------------------------------|-----------|--------|--------|--------|
| Uninsured                           | -3,129.1  | <.0001 | -0.094 | <.0001 |
| Other                               | -2,140.7  | <.0001 | -0.080 | <.0001 |
| <b>Number of comorbidities</b>      | 609.3     | <.0001 | 0.023  | <.0001 |
| <b>Main diagnosis of lupus</b>      | 4,700.6   | <.0001 | 0.071  | <.0001 |
| <b>In-hospital death</b>            | 32,059.4  | <.0001 | 0.307  | <.0001 |
| <b>Severity of illness subclass</b> |           |        |        |        |
| APR-DRG 0, 1, lowest (reference)    |           |        |        |        |
| APR-DRG 2                           | -3,930.2  | <.0001 | -0.086 | <.0001 |
| APR-DRG 3                           | 2,873.0   | <.0001 | 0.131  | <.0001 |
| APR-DRG 4, highest                  | 46,470.5  | <.0001 | 0.841  | <.0001 |
| <b>Hospital status</b>              |           |        |        |        |
| Urban nonteaching (reference)       |           |        |        |        |
| Urban teaching                      | 2,591.6   | <.0001 | 0.045  | <.0001 |
| Rural                               | -4,240.3  | <.0001 | -0.218 | <.0001 |
| <b>Region of hospital</b>           |           |        |        |        |
| West (reference)                    |           |        |        |        |
| Northeast                           | -8,553.6  | <.0001 | -0.246 | <.0001 |
| Midwest                             | -16,236.3 | <.0001 | -0.433 | <.0001 |
| South                               | -13,746.5 | <.0001 | -0.367 | <.0001 |
| <b>Bed capacity of hospital</b>     |           |        |        |        |
| Small (reference)                   |           |        |        |        |
| Medium                              | 2,905.2   | <.0001 | 0.128  | <.0001 |
| Large                               | -37.1     | 0.874  | 0.035  | <.0001 |

---

Multilevel multivariable linear regression and logistic regression were performed after adjusting for the severity of illness subclass (APR-DRG 0–1, 2, 3, and 4), region of hospital (West, Northeast, Midwest, and South), hospital status (urban nonteaching, urban teaching, and rural), and bed capacity of hospital (small, medium, and large).
